# Supplementary material
Source: PubMed Central journal article supplement (PMC4587598)
Supplement: tableS1.pdf [file tableS1.pdf]

1 **Effects of Moderate Global Maternal Nutrient Reduction on**  
2 **Fetal Baboon Renal Mitochondrial Gene Expression at 0.9**  
3 **Gestation.**

4

5 Susana P Pereira, M.Sc <sup>1,2,3</sup>, Paulo J Oliveira, PhD <sup>1,2</sup>, António J. Moreno, PhD <sup>2</sup>,  
6 Laura A Cox, PhD <sup>4</sup>, Peter W Nathanielsz, MD, PhD <sup>3</sup> and Mark J Nijland, PhD <sup>3</sup>.

7

8 <sup>1</sup> CNC - Center for Neuroscience and Cell Biology, University of Coimbra, Coimbra,  
9 Portugal, 3004-517.

10 <sup>2</sup> Department of Life Sciences, School of Sciences and Technology, University of  
11 Coimbra, Coimbra, Portugal, 3004-517.

12 <sup>3</sup> Center for Pregnancy and Newborn Research, University of Texas Health Science  
13 Center at San Antonio, San Antonio, Texas, United States, 78229-3900.

14 <sup>4</sup> Department of Genetics, Texas Biomedical Research Institute, San Antonio, Texas,  
15 United States, 78245-0549.

16

17

18 To whom correspondence should be addressed: Paulo J. Oliveira, PhD, Center for  
19 Neuroscience and Cell Biology, Largo Marquês de Pombal, 3004-517 Coimbra –  
20 Portugal, Phone: +351 239 855760, Fax: +351 239 855789, email:  
21 [pauloliv@ci.uc.pt](mailto:pauloliv@ci.uc.pt)

22

23

24 Table 2: mRNA abundance for mitochondrial proteins was assessed by PCR array in  
 25 whole kidney samples from baboon fetuses from mothers fed *ad libitum* (controls, C)  
 26 or 70% of the control diet (maternal nutrient restricted, MNR) at 0.9 gestation.  
 27 Symbol denotes the gene identification, RefSeq denotes the Reference Sequence from  
 28 the National Center for Biotechnology Information collection, Description gives a  
 29 summary information about the gene identification and/or function, Fold difference  
 30 was calculate between the groups enunciated, positive values for up regulation and  
 31 negative values for a down regulation. Fold differences relevant to the mitochondrial  
 32 profile of the control fetus (control female, C-F vs control male, C-M) were presented  
 33 in the C-F vs C-M section, as well the comparison of transcripts expression based on  
 34 maternal diet for the same gender (in the MNR-M vs C-M and MNR-F vs C-F  
 35 sections), the gender dimorphism in the mitochondrial profile of the MNR fetus (in  
 36 the MNR-F vs MNR-M section) and global diet-dependent effects in the  
 37 mitochondrial expression profile (MNR vs C section). The transcripts presented have  
 38 either  $0.05 < p < 0.1$  or  $p < 0.05$  in bold.

39

40

| Symbol            | Refseq    | Description                                                         | Fold difference | p-value      |
|-------------------|-----------|---------------------------------------------------------------------|-----------------|--------------|
| <b>C-F vs C-M</b> |           |                                                                     |                 |              |
| <i>NDUFB8</i>     | NM_005004 | NADH dehydrogenase (ubiquinone) 1 beta subcomplex                   | 2.656           | 0.075        |
| <i>NDUFV1</i>     | NM_007103 | NADH dehydrogenase (ubiquinone) flavoprotein 1                      | <b>2.302</b>    | <b>0.048</b> |
| <i>COX6A1</i>     | NM_004373 | Cytochrome c oxidase subunit VIa polypeptide 1                      | <b>1.758</b>    | <b>0.001</b> |
| <i>ATP5C1</i>     | NM_005174 | ATP synthase, H <sup>+</sup> transporting, mitochondrial F1 complex | <b>9.543</b>    | <b>0.005</b> |
| <i>IMMP1L</i>     | NM_144981 | IMP1 inner mitochondrial membrane peptidase-like                    | <b>1.397</b>    | <b>0.016</b> |
| <i>OPA1</i>       | NM_130837 | Optic atrophy 1                                                     | <b>-1.138</b>   | <b>0.024</b> |
| <i>CPT2</i>       | NM_000098 | Carnitine palmitoyltransferase 2                                    | 3.063           | 0.061        |
| <i>SLC25A17</i>   | NM_006358 | Solute carrier family 25 (mitochondrial carrier), member 17         | <b>-1.170</b>   | <b>0.037</b> |
| <i>TIMM17A</i>    | NM_006335 | Translocase of inner mitochondrial membrane 17                      | <b>-1.131</b>   | <b>0.016</b> |
| <i>TIMM9</i>      | NM_012460 | Translocase of inner mitochondrial membrane 9                       | <b>1.787</b>    | <b>0.010</b> |
| <i>TOMM70A</i>    | NM_014820 | Translocase of outer mitochondrial membrane 70                      | -1.155          | 0.052        |
| <i>SOD1</i>       | NM_000454 | Superoxide dismutase 1, soluble                                     | <b>-1.289</b>   | <b>0.034</b> |

|             |           |                                       |              |              |
|-------------|-----------|---------------------------------------|--------------|--------------|
| <i>SOD2</i> | NM_000636 | Superoxide dismutase 2, mitochondrial | 1.679        | 0.076        |
| <i>BID</i>  | NM_001196 | BH3 interacting domain death agonist  | <b>5.864</b> | <b>0.030</b> |
| <i>SFN</i>  | NM_006142 | Stratifin                             | <b>1.863</b> | <b>0.050</b> |

#### C-M vs MNR-M

|                 |           |                                                                                       |               |              |
|-----------------|-----------|---------------------------------------------------------------------------------------|---------------|--------------|
| <i>NDUFA1</i>   | NM_004541 | NADH dehydrogenase (ubiquinone) 1 alpha subcomplex, 1.                                | <b>-1.755</b> | <b>0.044</b> |
| <i>NDUFA2</i>   | NM_002488 | NADH dehydrogenase (ubiquinone) 1 alpha subcomplex, 2.                                | -1.540        | 0.078        |
| <i>NDUFA4</i>   | NM_002489 | NADH dehydrogenase (ubiquinone) 1 alpha subcomplex, 4.                                | <b>-5.377</b> | <b>0.045</b> |
| <i>NDUFA8</i>   | NM_014222 | NADH dehydrogenase (ubiquinone) 1 alpha subcomplex, 8.                                | -1.192        | 0.086        |
| <i>NDUFA10</i>  | NM_004544 | NADH dehydrogenase (ubiquinone) 1 alpha subcomplex, 10.                               | -1.756        | 0.052        |
| <i>NDUFAB1</i>  | NM_005003 | NADH dehydrogenase (ubiquinone) 1, alpha/beta subcomplex, 1.                          | -1.510        | 0.098        |
| <i>NDUFC1</i>   | NM_002494 | NADH dehydrogenase (ubiquinone) 1, subcomplex unknown, 1.                             | -1.502        | 0.097        |
| <i>NDUFS3</i>   | NM_004551 | NADH dehydrogenase (ubiquinone) Fe-S protein 3.                                       | -1.269        | 0.080        |
| <i>NDUFS5</i>   | NM_004552 | NADH dehydrogenase (ubiquinone) Fe-S protein 5.                                       | -1.250        | 0.051        |
| <i>NDUFV3</i>   | NM_021075 | NADH dehydrogenase (ubiquinone) flavoprotein 3.                                       | -1.290        | 0.080        |
| <i>SDHB</i>     | NM_003000 | Succinate dehydrogenase complex, subunit B, iron sulfur (Ip)                          | <b>-1.240</b> | <b>0.006</b> |
| <i>COX6A1</i>   | NM_004373 | Cytochrome c oxidase subunit VIa polypeptide 1                                        | <b>1.741</b>  | <b>0.000</b> |
| <i>OXA1L</i>    | NM_005015 | Oxidase (cytochrome c) assembly 1-like                                                | <b>-1.484</b> | <b>0.042</b> |
| <i>ATP5B</i>    | NM_001686 | ATP synthase, H <sup>+</sup> transporting, mitochondrial F1 complex, beta polypeptide | -1.602        | 0.059        |
| <i>ATP5J</i>    | NM_001685 | ATP synthase, H <sup>+</sup> transporting, mitochondrial Fo complex, subunit F6       | -1.406        | 0.085        |
| <i>ATP6VIC2</i> | NM_144583 | ATPase, H <sup>+</sup> transporting, lysosomal 42kDa, V1 subunit C2                   | <b>-2.032</b> | <b>0.027</b> |
| <i>OPA1</i>     | NM_130837 | Optic atrophy 1                                                                       | -1.152        | 0.087        |
| <i>FIS1</i>     | NM_016068 | Fission 1 (mitochondrial outer membrane)                                              | -1.185        | 0.080        |
| <i>SLC25A13</i> | NM_014251 | Solute carrier family 25, member 13                                                   | -1.271        | 0.099        |
| <i>SLC25A16</i> | NM_152707 | Solute carrier family 25 (mitochondrial carrier), member 16                           | -1.185        | 0.072        |
| <i>SLC25A17</i> | NM_006358 | Solute carrier family 25 (mitochondrial carrier), member 17                           | -1.112        | 0.073        |
| <i>TIMM23</i>   | NM_006327 | Translocase of inner mitochondrial membrane 23                                        | <b>-1.152</b> | <b>0.042</b> |
| <i>TIMM9</i>    | NM_012460 | Translocase of inner mitochondrial membrane 9                                         | <b>1.886</b>  | <b>0.014</b> |
| <i>SOD1</i>     | NM_000454 | Superoxide dismutase 1, soluble                                                       | <b>-1.375</b> | <b>0.009</b> |
| <i>AIFM2</i>    | NM_032797 | Apoptosis-inducing factor, mitochondrion-associated, 2                                | -1.222        | 0.072        |
| <i>SFN</i>      | NM_006142 | Stratifin                                                                             | <b>1.385</b>  | <b>0.021</b> |

#### C-F vs MNR-F

|                 |           |                                                                                              |               |              |
|-----------------|-----------|----------------------------------------------------------------------------------------------|---------------|--------------|
| <i>NDUFA11</i>  | NM_175614 | NADH dehydrogenase (ubiquinone) 1 alpha subcomplex, 11                                       | -1.443        | 0.098        |
| <i>NDUFB9</i>   | NM_005005 | NADH dehydrogenase (ubiquinone) 1 beta subcomplex, 9                                         | -1.438        | 0.072        |
| <i>NDUFB10</i>  | NM_004548 | NADH dehydrogenase (ubiquinone) 1 beta subcomplex, 10                                        | -1.391        | 0.082        |
| <i>NDUFS5</i>   | NM_004552 | NADH dehydrogenase (ubiquinone) Fe-S protein 5                                               | <b>-1.193</b> | <b>0.042</b> |
| <i>NDUFV3</i>   | NM_021075 | NADH dehydrogenase (ubiquinone) flavoprotein 3                                               | <b>-1.949</b> | <b>0.040</b> |
| <i>SDHA</i>     | NM_004168 | Succinate dehydrogenase complex, subunit A, flavoprotein                                     | -1.356        | 0.087        |
| <i>UQCRC2</i>   | NM_003366 | Ubiquinol-cytochrome c reductase core protein II                                             | -1.393        | 0.088        |
| <i>COX6A2</i>   | NM_005205 | Cytochrome c oxidase subunit VIa polypeptide 2                                               | <b>-1.206</b> | <b>0.049</b> |
| <i>COX6C</i>    | NM_004374 | Cytochrome c oxidase subunit VIc                                                             | -1.686        | 0.075        |
| <i>COX7B</i>    | NM_001866 | Cytochrome c oxidase subunit VIIb                                                            | <b>-1.304</b> | <b>0.050</b> |
| <i>ATP4B</i>    | NM_000705 | ATPase, H <sup>+</sup> /K <sup>+</sup> exchanging, beta polypeptide                          | -1.761        | 0.071        |
| <i>ATP5H</i>    | NM_006356 | ATP synthase, H <sup>+</sup> transporting, mitochondrial Fo complex, subunit d               | -1.249        | 0.069        |
| <i>ATP5J</i>    | NM_001685 | ATP synthase, H <sup>+</sup> transporting, mitochondrial Fo complex, subunit F6              | <b>-1.440</b> | <b>0.047</b> |
| <i>ATP12A</i>   | NM_001676 | ATPase, H <sup>+</sup> /K <sup>+</sup> transporting, nongastric, alpha polypeptide           | <b>-1.162</b> | <b>0.036</b> |
| <i>CPT1B</i>    | NM_004377 | Carnitine palmitoyltransferase 1B (muscle)                                                   | -1.633        | 0.091        |
| <i>MFN2</i>     | NM_014874 | Mitofusin 2                                                                                  | <b>-1.374</b> | <b>0.008</b> |
| <i>DNM1L</i>    | NM_005690 | Dynamin 1-like                                                                               | -1.220        | 0.097        |
| <i>GRPEL1</i>   | NM_025196 | GrpE-like 1, mitochondrial                                                                   | <b>-1.102</b> | <b>0.021</b> |
| <i>SLC25A3</i>  | NM_002635 | Solute carrier family 25 (mitochondrial carrier; phosphate carrier), member 3                | -1.945        | 0.083        |
| <i>SLC25A12</i> | NM_003705 | Solute carrier family 25 (mitochondrial carrier), member 12                                  | -1.618        | 0.068        |
| <i>SLC25A15</i> | NM_014252 | Solute carrier family 25 (mitochondrial carrier; ornithine transporter) member 15            | <b>1.777</b>  | <b>0.036</b> |
| <i>SLC25A16</i> | NM_152707 | Solute carrier family 25 (mitochondrial carrier), member 16                                  | <b>-1.331</b> | <b>0.047</b> |
| <i>SLC25A17</i> | NM_006358 | Solute carrier family 25 (mitochondrial carrier), member 17                                  | <b>-1.183</b> | <b>0.033</b> |
| <i>SLC25A31</i> | NM_031291 | Solute carrier family 25 (mitochondrial carrier; adenine nucleotide translocator), member 31 | <b>-2.481</b> | <b>0.016</b> |
| <i>AIFM2</i>    | NM_032797 | Apoptosis-inducing factor, mitochondrion-associated, 2                                       | -1.456        | 0.070        |
| <i>BBC3</i>     | NM_014417 | BCL2 binding component 3                                                                     | <b>-3.749</b> | <b>0.001</b> |
| <i>BID</i>      | NM_001196 | BH3 interacting domain death agonist                                                         | <b>-6.046</b> | <b>0.029</b> |
| <i>CDKN2A</i>   | NM_000077 | Cyclin-dependent kinase inhibitor 2A                                                         | <b>2.701</b>  | <b>0.024</b> |
| <i>STARD3</i>   | NM_006804 | StAR-related lipid transfer (START) domain containing 3                                      | <b>-1.147</b> | <b>0.023</b> |
| <i>LHPP</i>     | NM_022126 | Phospholysine phosphohistidine inorganic pyrophosphate phosphatase                           | -1.291        | 0.081        |

| MNR-F vs MNR-M  |           |                                                                                             |               |              |
|-----------------|-----------|---------------------------------------------------------------------------------------------|---------------|--------------|
| <i>NDUFA8</i>   | NM_014222 | NADH dehydrogenase (ubiquinone) 1 alpha subcomplex, 8                                       | -1.188        | 0.067        |
| <i>NDUFB9</i>   | NM_005005 | NADH dehydrogenase (ubiquinone) 1 beta subcomplex, 9                                        | <b>-1.193</b> | <b>0.043</b> |
| <i>NDUFC1</i>   | NM_002494 | NADH dehydrogenase (ubiquinone) 1                                                           | <b>-1.091</b> | <b>0.033</b> |
| <i>NDUFS4</i>   | NM_002495 | NADH dehydrogenase (ubiquinone) Fe-S protein 4                                              | -1.182        | 0.056        |
| <i>NDUFS5</i>   | NM_004552 | NADH dehydrogenase (ubiquinone) Fe-S protein 5                                              | -1.120        | 0.062        |
| <i>SDHA</i>     | NM_004168 | Succinate dehydrogenase complex, subunit A, flavoprotein                                    | -1.226        | 0.071        |
| <i>UQCRH</i>    | NM_006004 | Ubiquinol-cytochrome c reductase hinge protein                                              | <b>-1.218</b> | <b>0.034</b> |
| <i>UQCRQ</i>    | NM_014402 | Ubiquinol-cytochrome c reductase, complex III subunit VII                                   | -1.453        | 0.233        |
| <i>COX4I1</i>   | NM_001861 | Cytochrome c oxidase subunit IV isoform 1                                                   | <b>-1.151</b> | <b>0.004</b> |
| <i>COX4I2</i>   | NM_032609 | Cytochrome c oxidase subunit IV isoform 2                                                   | <b>-1.293</b> | <b>0.038</b> |
| <i>COX6A2</i>   | NM_005205 | Cytochrome c oxidase subunit VIa polypeptide 2                                              | <b>1.718</b>  | <b>0.004</b> |
| <i>COX6B2</i>   | NM_144613 | Cytochrome c oxidase subunit VIb polypeptide 2                                              | <b>1.750</b>  | <b>0.026</b> |
| <i>COX7B</i>    | NM_001866 | Cytochrome c oxidase subunit VIIb                                                           | -1.121        | 0.093        |
| <i>ATP5C1</i>   | NM_005174 | ATP synthase, H <sup>+</sup> transporting, mitochondrial F1 complex, gamma polypeptide 1    | <b>5.818</b>  | <b>0.002</b> |
| <i>ATP5F1</i>   | NM_001688 | ATP synthase, H <sup>+</sup> transporting, mitochondrial Fo complex, subunit B1             | 1.235         | 0.090        |
| <i>ATP5O</i>    | NM_001697 | ATP synthase, H <sup>+</sup> transporting, mitochondrial F1 complex, O subunit              | -1.171        | 0.059        |
| <i>MFN2</i>     | NM_014874 | Mitofusin 2                                                                                 | -1.302        | 0.053        |
| <i>DNM1L</i>    | NM_005690 | Dynamin 1-like                                                                              | <b>-1.306</b> | <b>0.039</b> |
| <i>CPT1B</i>    | NM_004377 | Carnitine palmitoyltransferase 1B                                                           | -1.494        | 0.075        |
| <i>MSTO1</i>    | NM_018116 | Misato homolog 1                                                                            | <b>-1.330</b> | <b>0.021</b> |
| <i>MIPEP</i>    | NM_005932 | Mitochondrial intermediate peptidase                                                        | -1.380        | 0.062        |
| <i>RHOT1</i>    | NM_018307 | Ras homolog gene family, member T1                                                          | -1.301        | 0.092        |
| <i>SLC25A17</i> | NM_006358 | Solute carrier family 25 (mitochondrial carrier), member 17                                 | <b>-1.244</b> | <b>0.007</b> |
| <i>SLC25A4</i>  | NM_001151 | Solute carrier family 25 (mitochondrial carrier; adenine nucleotide translocator), member 4 | <b>-1.216</b> | <b>0.012</b> |
| <i>LRPPRC</i>   | NM_133259 | Leucine-rich PPR-motif containing                                                           | -1.141        | 0.070        |
| <i>SOD1</i>     | NM_000454 | Superoxide dismutase 1, soluble                                                             | 1.132         | 0.099        |
| <i>BBC3</i>     | NM_014417 | BCL2 binding component 3                                                                    | <b>-2.537</b> | <b>0.030</b> |
| <i>SH3GLB1</i>  | NM_016009 | SH3-domain GRB2-like endophilin B1                                                          | -1.131        | 0.060        |

| MNR vs C      |           |                                                       |               |              |
|---------------|-----------|-------------------------------------------------------|---------------|--------------|
| <i>NDUFA1</i> | NM_004541 | NADH dehydrogenase (ubiquinone) 1 alpha subcomplex, 1 | <b>-1.540</b> | <b>0.014</b> |
| <i>NDUFA2</i> | NM_002488 | NADH dehydrogenase (ubiquinone) 1 alpha subcomplex, 2 | <b>-1.455</b> | <b>0.014</b> |

|                |           |                                                                    |               |              |
|----------------|-----------|--------------------------------------------------------------------|---------------|--------------|
| <i>NDUFA4</i>  | NM_002489 | NADH dehydrogenase (ubiquinone) 1 alpha subcomplex, 4              | <b>-2.782</b> | <b>0.008</b> |
| <i>NDUFA5</i>  | NM_005000 | NADH dehydrogenase (ubiquinone) 1 alpha subcomplex, 5              | <b>-1.926</b> | <b>0.028</b> |
| <i>NDUFA7</i>  | NM_005001 | NADH dehydrogenase (ubiquinone) 1 alpha subcomplex, 7              | <b>-1.332</b> | <b>0.043</b> |
| <i>NDUFA8</i>  | NM_014222 | NADH dehydrogenase (ubiquinone) 1 alpha subcomplex, 8              | <b>-1.251</b> | <b>0.021</b> |
| <i>NDUFA10</i> | NM_004544 | NADH dehydrogenase (ubiquinone) 1 alpha subcomplex, 10             | <b>-1.623</b> | <b>0.009</b> |
| <i>NDUFA11</i> | NM_175614 | NADH dehydrogenase (ubiquinone) 1 alpha subcomplex, 11             | <b>-1.420</b> | <b>0.034</b> |
| <i>NDUFAB1</i> | NM_005003 | NADH dehydrogenase (ubiquinone) 1, alpha/beta subcomplex, 1        | <b>-1.436</b> | <b>0.026</b> |
| <i>NDUFB5</i>  | NM_002492 | NADH dehydrogenase (ubiquinone) 1 beta subcomplex, 5               | <b>-1.298</b> | <b>0.035</b> |
| <i>NDUFB9</i>  | NM_005005 | NADH dehydrogenase (ubiquinone) 1 beta subcomplex, 9               | <b>-1.327</b> | <b>0.023</b> |
| <i>NDUFB10</i> | NM_004548 | NADH dehydrogenase (ubiquinone) 1 beta subcomplex, 10              | -1.325        | 0.055        |
| <i>NDUFC1</i>  | NM_002494 | NADH dehydrogenase (ubiquinone) 1                                  | <b>-1.415</b> | <b>0.016</b> |
| <i>NDUFC2</i>  | NM_004549 | NADH dehydrogenase (ubiquinone) 1                                  | <b>-1.926</b> | <b>0.028</b> |
| <i>NDUFS1</i>  | NM_005006 | NADH dehydrogenase (ubiquinone) Fe-S protein 1                     | -1.277        | 0.062        |
| <i>NDUFS3</i>  | NM_004551 | NADH dehydrogenase (ubiquinone) Fe-S protein 3                     | <b>-1.236</b> | <b>0.029</b> |
| <i>NDUFS4</i>  | NM_002495 | NADH dehydrogenase (ubiquinone) Fe-S protein 4                     | <b>-1.188</b> | <b>0.049</b> |
| <i>NDUFS5</i>  | NM_004552 | NADH dehydrogenase (ubiquinone) Fe-S protein 5                     | <b>-1.221</b> | <b>0.011</b> |
| <i>NDUFS8</i>  | NM_002496 | NADH dehydrogenase (ubiquinone) Fe-S protein 8                     | <b>-1.274</b> | <b>0.038</b> |
| <i>NDUFV2</i>  | NM_021074 | NADH dehydrogenase (ubiquinone) flavoprotein 2                     | -1.208        | 0.075        |
| <i>NDUFV3</i>  | NM_021075 | NADH dehydrogenase (ubiquinone) flavoprotein 3                     | <b>-1.586</b> | <b>0.004</b> |
| <i>SDHA</i>    | NM_004168 | Succinate dehydrogenase complex, subunit A, flavoprotein           | <b>-1.321</b> | <b>0.038</b> |
| <i>SDHB</i>    | NM_003000 | Succinate dehydrogenase complex, subunit B, iron sulfur            | <b>-1.176</b> | <b>0.012</b> |
| <i>UQCRC1</i>  | NM_003365 | Ubiquinol-cytochrome c reductase core protein I                    | <b>-1.516</b> | <b>0.032</b> |
| <i>UQCRC2</i>  | NM_003366 | Ubiquinol-cytochrome c reductase core protein II                   | -1.411        | 0.053        |
| <i>UQCRFS1</i> | NM_006003 | Ubiquinol-cytochrome c reductase, Rieske iron-sulfur polypeptide 1 | <b>-1.366</b> | <b>0.024</b> |
| <i>CYC1</i>    | NM_001916 | Cytochrome c-1                                                     | -1.307        | 0.101        |
| <i>COX4I1</i>  | NM_001861 | Cytochrome c oxidase subunit IV isoform 1                          | <b>-1.281</b> | <b>0.017</b> |
| <i>COX4I2</i>  | NM_032609 | Cytochrome c oxidase subunit IV isoform 2                          | <b>-1.245</b> | 0.082        |
| <i>COX5A</i>   | NM_004255 | Cytochrome c oxidase subunit Va                                    | <b>-1.296</b> | <b>0.037</b> |
| <i>COX5B</i>   | NM_001862 | Cytochrome c oxidase subunit Vb                                    | <b>-1.254</b> | <b>0.028</b> |
| <i>COX6A1</i>  | NM_004373 | Cytochrome c oxidase subunit VIa polypeptide 1                     | 1.306         | 0.078        |

|                 |           |                                                                                              |               |              |
|-----------------|-----------|----------------------------------------------------------------------------------------------|---------------|--------------|
| <i>COX6B1</i>   | NM_001863 | Cytochrome c oxidase subunit Vib polypeptide 1                                               | -1.367        | 0.057        |
| <i>COX7B</i>    | NM_001866 | Cytochrome c oxidase subunit VIIIb                                                           | -1.188        | 0.072        |
| <i>COX8A</i>    | NM_004074 | Cytochrome c oxidase subunit VIIIA                                                           | 1.234         | 0.672        |
| <i>COX8C</i>    | NM_182971 | Cytochrome c oxidase subunit VIIIC                                                           | <b>-1.926</b> | <b>0.028</b> |
| <i>COX10</i>    | NM_001303 | COX10 homolog, cytochrome c oxidase assembly protein                                         | <b>-1.309</b> | 0.063        |
| <i>OXA1L</i>    | NM_005015 | Oxidase (cytochrome c) assembly 1-like                                                       | <b>-1.450</b> | <b>0.016</b> |
| <i>ATP4A</i>    | NM_000704 | ATPase, H <sup>+</sup> /K <sup>+</sup> exchanging, alpha polypeptide                         | <b>-1.345</b> | <b>0.038</b> |
| <i>ATP4B</i>    | NM_000705 | ATPase, H <sup>+</sup> /K <sup>+</sup> exchanging, beta polypeptide                          | <b>-1.926</b> | <b>0.028</b> |
| <i>ATP5B</i>    | NM_001686 | ATP synthase, H <sup>+</sup> transporting, mitochondrial F1 complex, beta polypeptide        | <b>-1.421</b> | <b>0.027</b> |
| <i>ATP5G1</i>   | NM_005175 | ATP synthase, H <sup>+</sup> transporting, mitochondrial Fo complex, subunit C1              | <b>-2.588</b> | <b>0.023</b> |
| <i>ATP5G3</i>   | NM_001689 | ATP synthase, H <sup>+</sup> transporting, mitochondrial Fo complex, subunit C3              | <b>9.231</b>  | <b>0.018</b> |
| <i>ATP5I</i>    | NM_007100 | ATP synthase, H <sup>+</sup> transporting, mitochondrial Fo complex, subunit E               | -1.194        | 0.063        |
| <i>ATP5J</i>    | NM_001685 | ATP synthase, H <sup>+</sup> transporting, mitochondrial Fo complex, subunit F6              | <b>-1.423</b> | <b>0.003</b> |
| <i>ATP5O</i>    | NM_001697 | ATP synthase, H <sup>+</sup> transporting, mitochondrial F1 complex, O subunit               | <b>-1.290</b> | <b>0.029</b> |
| <i>ATP6V0A2</i> | NM_012463 | ATPase, H <sup>+</sup> transporting, lysosomal V0 subunit a2                                 | <b>-1.856</b> | <b>0.020</b> |
| <i>ATP6VIC2</i> | NM_144583 | ATPase, H <sup>+</sup> transporting, lysosomal, V1 subunit C2                                | <b>-1.606</b> | <b>0.028</b> |
| <i>SLC25A13</i> | NM_014251 | Solute carrier family 25, member 13 (citrin)                                                 | -1.148        | 0.085        |
| <i>SLC25A15</i> | NM_014252 | Solute carrier family 25 (mitochondrial carrier; ornithine transporter) member 15            | <b>1.853</b>  | <b>0.014</b> |
| <i>SLC25A16</i> | NM_152707 | Solute carrier family 25 (mitochondrial carrier), member 16                                  | <b>-1.256</b> | <b>0.003</b> |
| <i>SLC25A17</i> | NM_006358 | Solute carrier family 25 (mitochondrial carrier), member 17                                  | -1.147        | 0.069        |
| <i>SLC25A23</i> | NM_024103 | Solute carrier family 25 (mitochondrial carrier; phosphate carrier), member 23               | <b>-1.269</b> | <b>0.050</b> |
| <i>SLC25A27</i> | NM_004277 | Solute carrier family 25, member 27                                                          | <b>10.446</b> | <b>0.029</b> |
| <i>SLC25A31</i> | NM_031291 | Solute carrier family 25 (mitochondrial carrier; adenine nucleotide translocator), member 31 | <b>-2.199</b> | <b>0.035</b> |
| <i>FXC1</i>     | NM_012192 | Fracture callus 1 homolog                                                                    | <b>-1.155</b> | <b>0.029</b> |
| <i>TIMM23</i>   | NM_006327 | Translocase of inner mitochondrial membrane 23                                               | <b>-1.120</b> | <b>0.024</b> |
| <i>TOMM20</i>   | NM_014765 | Translocase of outer mitochondrial membrane 20                                               | -1.159        | 0.062        |
| <i>TOMM34</i>   | NM_006809 | Translocase of outer mitochondrial membrane 34                                               | -1.339        | 0.082        |
| <i>TOMM70A</i>  | NM_014820 | Translocase of outer mitochondrial membrane 70                                               | -1.214        | 0.073        |
| <i>MIPEP</i>    | NM_005932 | Mitochondrial intermediate peptidase                                                         | -1.211        | 0.097        |
| <i>OPA1</i>     | NM_130837 | Optic atrophy 1                                                                              | -1.096        | 0.072        |

|                |           |                                                        |               |              |
|----------------|-----------|--------------------------------------------------------|---------------|--------------|
| <i>AIFM2</i>   | NM_032797 | Apoptosis-inducing factor, mitochondrion-associated, 2 | <b>-1.334</b> | <b>0.007</b> |
| <i>BBC3</i>    | NM_014417 | BCL2 binding component 3                               | -1.836        | 0.056        |
| <i>CDKN2A</i>  | NM_000077 | Cyclin-dependent kinase inhibitor 2A (inhibits CDK4)   | 1.751         | 0.088        |
| <i>SH3GLB1</i> | NM_016009 | SH3-domain GRB2-like endophilin B1                     | -1.125        | 0.082        |
| <i>UXT</i>     | NM_004182 | Ubiquitously-expressed transcript                      | -1.109        | 0.078        |
| <i>PPA1</i>    | NM_021129 | Pyrophosphatase (inorganic) 1                          | <b>-1.392</b> | <b>0.038</b> |
| <i>PPA2</i>    | NM_176869 | Pyrophosphatase (inorganic) 2                          | <b>-1.798</b> | <b>0.031</b> |

---

41

42
